# Supplementary material
Source: PubMed Central journal article supplement (PMC8846395)
Supplement: jb.00533-21-s0001.pdf [file jb.00533-21-s0001.pdf]

**The WalR-WalK signaling pathway modulates the activities of both CwlO and LytE through control of the peptidoglycan deacetylase PdaC in *Bacillus subtilis***

Genevieve S. Dobihal, Josué Flores-Kim, Ian J. Roney, Xindan Wang, David Z. Rudner

**Supplemental Figures and Tables**

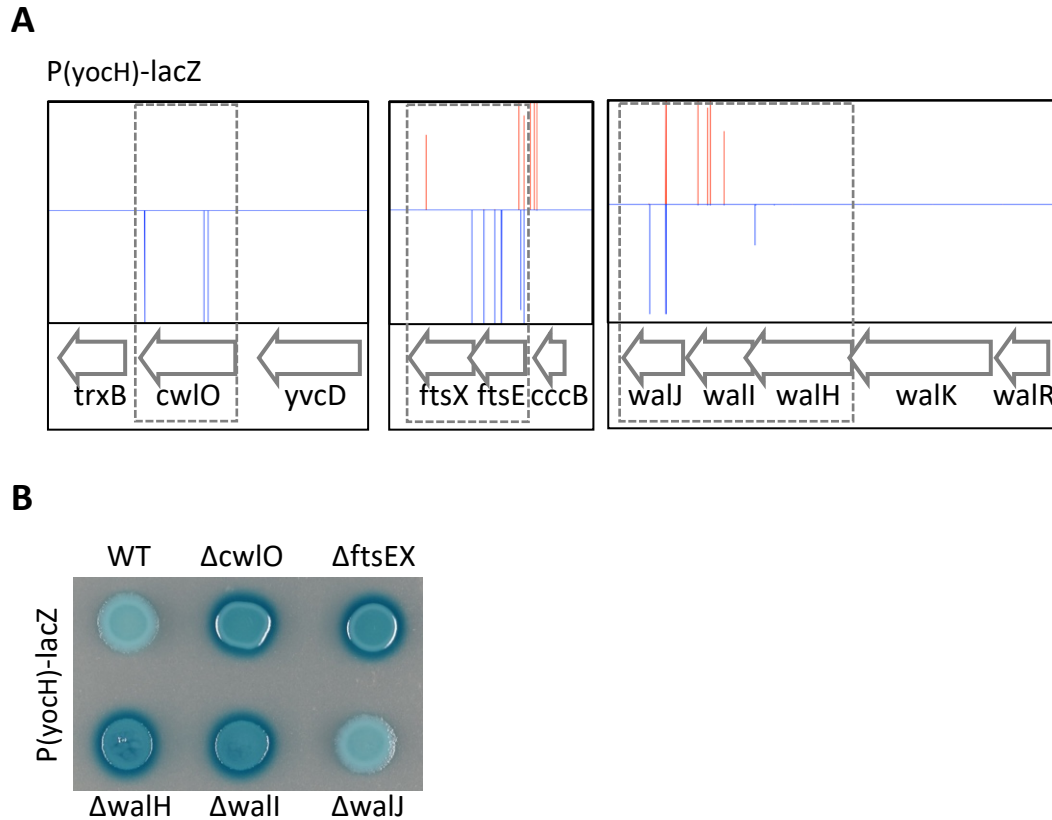

**Figure S1: Transposon-sequencing screen for activators of WalR-WalK signaling identifies known regulators.** To identify mutants that increase WalRK signaling, a transposon was used to mutagenize a strain harboring the WalR activity reporter P(yocH)-lacZ. **(A)** Transposon insertion profile from three regions of the *B. subtilis* genome. Each line indicates a transposon insert site, its height represents the number of sequencing reads, and its color (red or blue) indicates its orientation. Insertions in *cwI*, *ftsEX*, *walH*, and *walI* that are known to regulate WalRK signaling are shown. **(B)** Strains harboring the indicated deletions in the P(yocH)-lacZ background were confirmed to increase WalRK signaling when strains were spotted on LB agar plates containing 100mg/mL X-gal. Images were taken after overnight incubation at 37°C. Transposon insertions in *walJ* were hits in the screen but a deletion mutant did not validate.

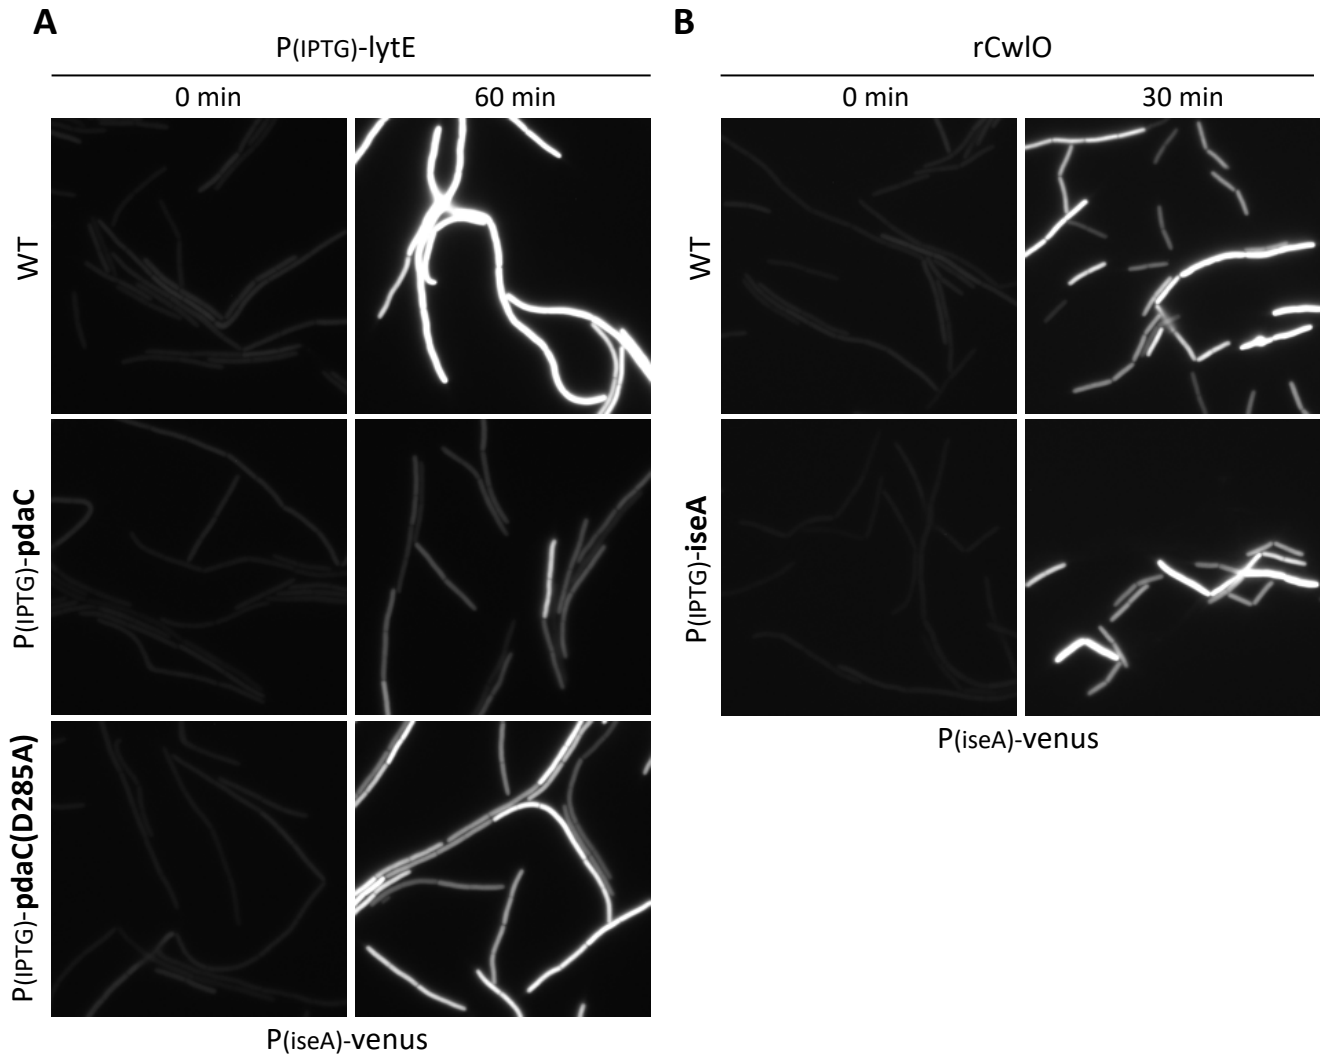

**Figure S2: Over-expression of *pdaC* counteracts WalRK inhibition in response to high D,L-endopeptidase activity.** (A) Representative fluorescent images of the *P(iseA)-venus* transcriptional reporter in the indicated strains containing an IPTG-regulated promoter fusion to *lytE*. Cells were grown to OD600 ~0.15 and images were taken before (0 min) and after (60 min) addition of IPTG (50  $\mu$ M). Over-expression of the catalytic mutant PdaC(D285A) fails to prevent inhibition of WalRK and de-repression of *P(iseA)-venus*. (B) Representative fluorescent images of the *P(iseA)-venus* transcriptional reporter in the indicated strains before (0 min) and after (30 min) the addition of 70  $\mu$ g/mL (final) recombinant CwLO (rCwLO). rCwLO inhibited WalRK signaling and de-repressed *P(iseA)-venus* in wild-type. Over-expression of *iseA* (500  $\mu$ M IPTG) for 60 min prior to addition of rCwLO did not prevent inhibition of WalRK.

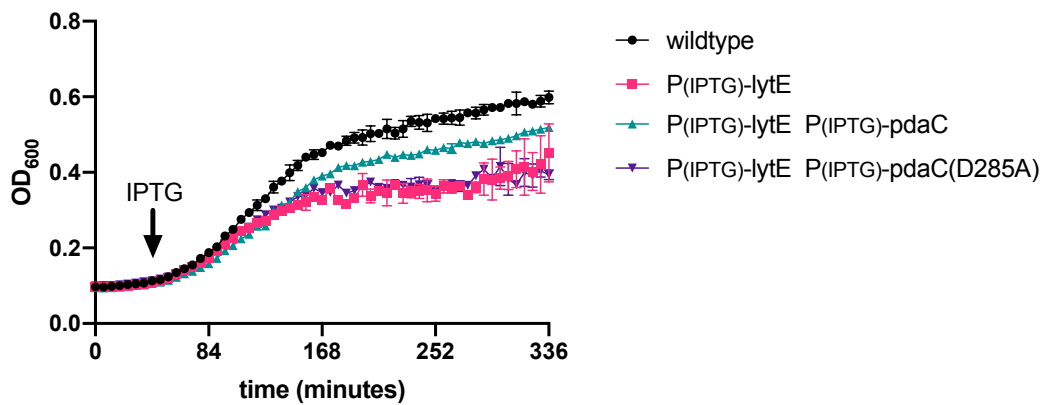

**Figure S3: Impaired growth due to *lytE* over-expression can be suppressed by over-expression of *pdaC* but not a catalytic mutant.** The indicated strains were grown in LB medium to mid-log, normalized to OD<sub>600</sub> = 0.02 in LB, and grown at 37°C. After 1 hour, IPTG (50  $\mu$ M) was added to the culture, and growth was resumed. OD<sub>600</sub> measurements were taken every 6 minutes for 5 hours. Representative growth curves are from one of three biological replicates.

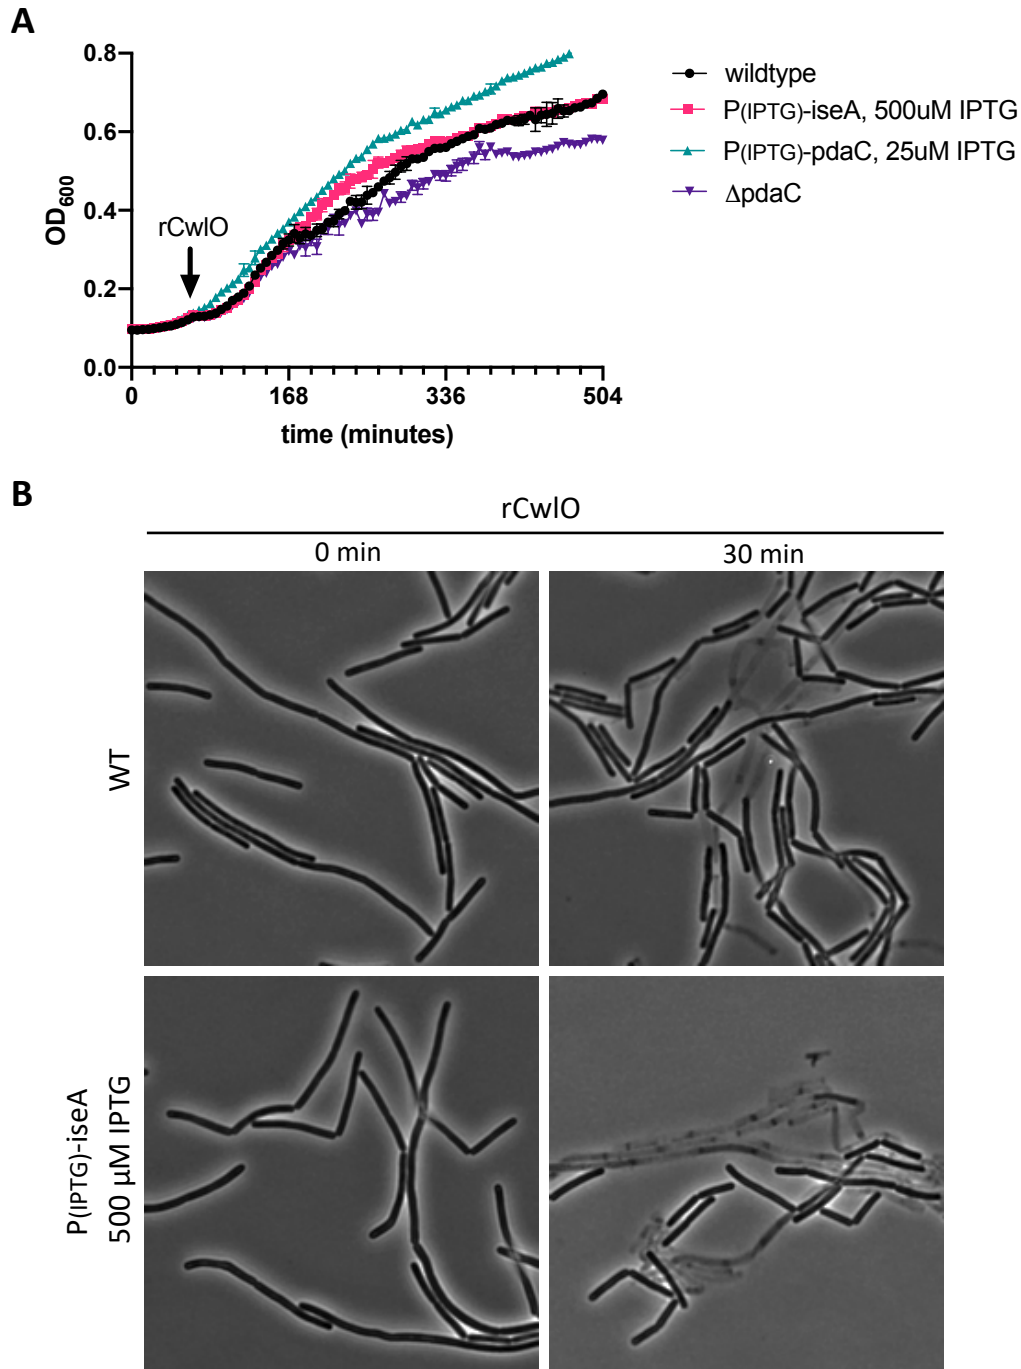

**Figure S4: Over-expression of *iseA* does not protect from exogenously-added CwIO . (A)** Growth curves of the indicated strains. Wild-type,  $\Delta$ *pdaC*, and strains harboring an IPTG-regulated promoter fused to *iseA* or *pdaC* were grown for 1 hour in LB medium (with the indicated amount of IPTG) to OD<sub>600</sub> of ~0.15. Recombinant CwIO was then added (70  $\mu$ g/mL final) and growth at 37°C was resumed. OD<sub>600</sub> measurements were taken every 6 minutes for 8 hours. **(B)** Representative phase-contrast images of the indicated strains before (0 min) and after (30 min) addition of rCwIO.

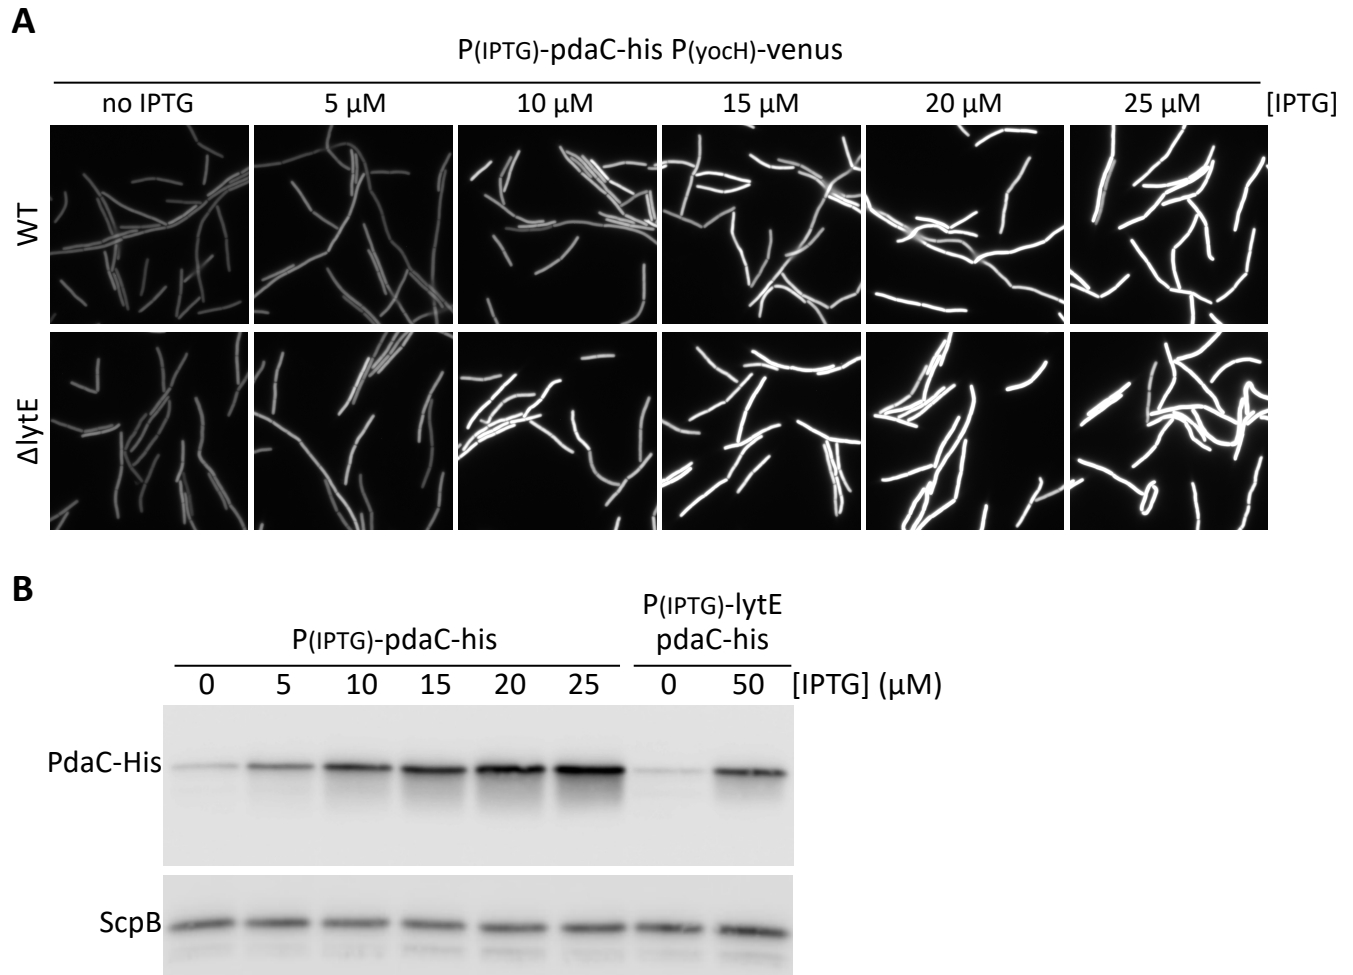

**Figure S5: Comparing IPTG-regulated expression of *pdaC* and induction of native *pdaC* in response to increased levels of the D,L-endopeptidase *LytE*.** (A) Representative images of P(*yoch*)-*venus* fluorescence in the indicated strains harboring an IPTG-regulated promoter fusion to *pdaC*. Increased WalR-dependent expression of P(*yoch*)-*venus* can be detected in the presence of 10  $\mu$ M IPTG for wild-type, and 5  $\mu$ M for the strain in which CwIO is the only elongation-specific D,L-endopeptidase present ( $\Delta$ *lytE*). Strains were grown to OD600 ~0.15 in LB medium, induced with IPTG, and imaged 60 min later. (B) Immunoblot analysis of His-tagged PdaC protein levels. Strains contained *pdaC*-*his* fused to an IPTG-regulated promoter, or under native control at its native locus with an IPTG-regulated promoter fusion to *lytE*. Cells were grown to OD600 ~0.15 in LB medium and samples were taken 60 minutes after induction with the indicated concentration of IPTG. The levels of PdaC-His that result from increased levels of *LytE* are similar to the levels of PdaC-His produced with 10  $\mu$ M IPTG. ScpB was used to control for loading.

**Table S1. Primary hits from Tn-seq screen for high WalRK activity**

| Gene           | Hit type        | Validation?  |
|----------------|-----------------|--------------|
| <i>yycIJ</i>   | inactivation    | weak         |
| <i>ydhE</i>    | inactivation    | no           |
| <i>yvrGH</i>   | inactivation    | weak         |
| <i>cwlO</i>    | inactivation    | yes          |
| <i>ftsEX</i>   | inactivation    | yes          |
| <i>walHI</i>   | inactivation    | yes          |
| <i>dacA</i>    | inactivation    | weak         |
| <i>ponA</i>    | inactivation    | weak         |
| <i>tagVUEC</i> | inactivation    | no           |
| <i>tagFGH</i>  | over-expression | intermediate |
| <i>ggaAB</i>   | inactivation    | no           |
| <i>pdaC</i>    | over-expression | yes          |
| <i>ltaS</i>    | inactivation    | intermediate |
| <i>pgcA</i>    | inactivation    | no           |
| <i>gtaB</i>    | inactivation    | weak         |
| <i>manA</i>    | inactivation    | no           |
| <i>galE</i>    | inactivation    | yes          |
| <i>fliDST</i>  | inactivation    | weak         |
| <i>degSU</i>   | inactivation    | no           |
| <i>lytA</i>    | inactivation    | no           |
| <i>ybfF</i>    | inactivation    | no           |

**Table S1: Validation of hits from the Tn-seq screen.** Genes, or gene clusters, that were enriched for transposon insertions are listed. Hits listed as inactivation contained insertions within the coding region. Over-expression hits contained insertions upstream of the coding region, oriented in a direction that the  $P_{pen}$  promoter was co-directional with gene transcription. Hits were validated by spotting insertion-deletion mutants harboring  $P_{yocH}$ -*lacZ* on LB agar plates containing 100  $\mu$ g/mL X-Gal. Mutants that generated a subtle or modest increase in blue color compared to wild-type after >24 hours of incubation were designated "weak" or "intermediate", respectively. We suspect the impact on WalRK signaling in these mutants is indirect and/or results from defects in envelope permeability that increases the ability of X-Gal to access  $\beta$ -galactosidase in the cell cytoplasm as is likely to be the case for the *galE* mutant. Importantly, the increase in blue color was substantially stronger for insertions in *cwlO*, *ftsEX*, *walHI*, and when *pdaC* was over-expressed.

**Table S2. *Bacillus subtilis* strains used in this study**

| Strain | Genotype                                                                                                    | Source                    | Figure                |
|--------|-------------------------------------------------------------------------------------------------------------|---------------------------|-----------------------|
| PY79   | wildtype                                                                                                    | Youngman et al., 1983 [1] | Source of all strains |
| bGD729 | <i>ycgO::PyocH-optRBS-lacZ</i> (kan)                                                                        | This study                | 1, S1                 |
| bGD780 | <i>ycgO::PyocH-optRBS-lacZ</i> (kan) $\Delta$ <i>pdaC::erm</i>                                              | This study                | 1                     |
| bGD819 | <i>ycgO::PyocH-optRBS-lacZ</i> (kan) <i>yvbJ::Phyperspank-optRBS-pdaC</i> (spec)                            | This study                | 1                     |
| bGD910 | <i>ycgO::PyocH-optRBS-lacZ</i> (kan) $\Delta$ <i>ctaO::erm</i>                                              | This study                | 1                     |
| bGD911 | <i>ycgO::PyocH-optRBS-lacZ</i> (kan) $\Delta$ <i>cotT::erm</i>                                              | This study                | 1                     |
| bGD731 | <i>ycgO::PyocH-optRBS-lacZ</i> (kan) $\Delta$ <i>cwlO::cat</i>                                              | This study                | S1                    |
| bGD902 | <i>ycgO::PyocH-optRBS-lacZ</i> (kan) $\Delta$ <i>ftsEX::cat</i>                                             | This study                | S1                    |
| bGD781 | <i>ycgO::PyocH-optRBS-lacZ</i> (kan) $\Delta$ <i>walH::erm</i>                                              | This study                | S1                    |
| bGD895 | <i>ycgO::PyocH-optRBS-lacZ</i> (kan) $\Delta$ <i>wall::erm</i>                                              | This study                | S1                    |
| bGD901 | <i>ycgO::PyocH-optRBS-lacZ</i> (kan) $\Delta$ <i>wall::erm</i>                                              | This study                | S1                    |
| bGD300 | <i>amyE::PyocH-optRBS-venus</i> (cat)                                                                       | Dobihal et al., 2019 [2]  | 2                     |
| bGD818 | <i>amyE::PyocH-optRBS-venus</i> (cat) <i>yvbJ::Phyperspank-optRBS-pdaC</i> (spec)                           | This study                | 2, S5                 |
| bGD709 | <i>amyE::PyocH-optRBS-venus</i> (cat) <i>ycgO::Phyperspank-optRBS-iseA</i> (erm)                            | This study                | 2                     |
| bGD857 | <i>yvbJ::Phyperspank-optRBS-pdaC</i> (spec) $\Delta$ <i>cwlO::kan</i> <i>amyE::PyocH-optRBS-venus</i> (cat) | This study                | 2                     |
| bGD853 | <i>ycgO::Phyperspank-optRBS-iseA</i> (erm) $\Delta$ <i>cwlO::kan</i> <i>amyE::PyocH-optRBS-venus</i> (cat)  | This study                | 2                     |
| bGD855 | <i>yvbJ::Phyperspank-optRBS-pdaC</i> (spec) $\Delta$ <i>lytE::kan</i> <i>amyE::PyocH-optRBS-venus</i> (cat) | This study                | 2                     |
| bGD851 | <i>ycgO::Phyperspank-optRBS-iseA</i> (erm) $\Delta$ <i>lytE::kan</i> <i>amyE::PyocH-optRBS-venus</i> (cat)  | This study                | 2                     |

|         |                                                                                                                                     |                         |        |
|---------|-------------------------------------------------------------------------------------------------------------------------------------|-------------------------|--------|
| bGD170  | <i>ΔpdaC::erm</i>                                                                                                                   | This study              | 2      |
| bGD919  | <i>ΔpdaC::erm yhdG::PpdaC-pdaC-6xHis</i> (kan)                                                                                      | This study              | 2      |
| bGD950  | <i>yvbJ::Phyperspank-optRBS-pdaC-6xHis</i> (spec)                                                                                   | This study              | 2, S5  |
| bGD975  | <i>amyE::PyocH-optRBS-venus</i> (cat) <i>yvbJ::Phyperspank-optRBS-pdaC-6xHis</i> (spec)                                             | This study              | 2      |
| bGD983  | <i>amyE::PyocH-optRBS-venus</i> (cat) <i>yvbJ::Phyperspank-optRBS-pdaC(D285A)-6xHis</i> (spec)                                      | This study              | 2      |
| bGD984  | <i>amyE::PyocH-optRBS-venus</i> (cat) <i>yvbJ::Phyperspank-optRBS-pdaC(H427A)-6xHis</i> (spec)                                      | This study              | 2      |
| bGD110  | <i>amyE::PiseA-optRBS-venus</i> (cat)                                                                                               | Dobihal et al. 2019 [2] | 3, S2  |
| bGD294  | <i>amyE::PiseA-optRBS-venus</i> (cat) <i>yvbJ::Phyperspank-optRBS-lytE</i> (spec)                                                   | Dobihal et al. 2019 [2] | 3, S2  |
| bGD708  | <i>amyE::PiseA-optRBS-venus</i> (cat) <i>yvbJ::Phyperspank-optRBS-lytE</i> (spec) <i>ycgO::Phyperspank-optRBS-iseA</i> (erm)        | This study              | 3      |
| bGD870  | <i>amyE::PiseA-optRBS-venus</i> (cat) <i>yvbJ::Phyperspank-optRBS-lytE</i> (spec) <i>ycgO::Phyperspank-optRBS-pdaC</i> (erm)        | This study              | 3, S2  |
| bGD871  | <i>amyE::PiseA-optRBS-venus</i> (cat) <i>ΔpdaC::erm</i>                                                                             | This study              | 3      |
| bGD869  | <i>amyE::PiseA-optRBS-venus</i> (cat) <i>ycgO::Phyperspank-optRBS-pdaC</i> (erm)                                                    | This study              | 3      |
| bGD707  | <i>amyE::PiseA-optRBS-venus</i> (cat) <i>ycgO::Phyperspank-optRBS-iseA</i> (erm)                                                    | This study              | S2, S4 |
| bGD1018 | <i>yvbJ::Phyperspank-optRBS-lytE</i> (spec) <i>amyE::PiseA-optRBS-venus</i> (cat) <i>ycgO::Phyperspank-optRBS-pdaC(D285A)</i> (erm) | This study              | S2, S3 |
| bGD810  | <i>yvbJ::Phyperspank-optRBS-pdaC</i> (spec)                                                                                         | This study              | 4      |
| bGD847  | <i>yvbJ::Phyperspank-optRBS-pdaC</i> (spec) <i>ΔlytE::kan</i>                                                                       | This study              | 4      |
| bGD848  | <i>yvbJ::Phyperspank-optRBS-pdaC</i> (spec) <i>ΔcwI::kan</i>                                                                        | This study              | 4      |
| bGD997  | <i>amyE::PiseA-optRBS-venus</i> (cat) <i>ytol::Pveg-mTagBFP</i> (kan)                                                               | This study              | 4      |
| bGD998  | <i>amyE::PiseA-optRBS-venus</i> (cat) <i>ΔpdaC::erm ytol::Pveg-mTagBFP</i> (kan)                                                    | This study              | 4      |
| bGD999  | <i>amyE::PiseA-optRBS-venus</i> (cat) <i>ycgO::Phyperspank-optRBS-pdaC</i> (erm) <i>ytol::Pveg-mTagBFP</i> (kan)                    | This study              | 4      |

|        |                                                                           |            |    |
|--------|---------------------------------------------------------------------------|------------|----|
| bGD965 | <i>pdaC::pdaC-6xHis</i> (kan)                                             | This study | S5 |
| bGD976 | <i>pdaC::pdaC-6xHis</i> (kan) <i>yvbJ::Phyperspank-optRBS-lytE</i> (spec) | This study | S5 |

**Table S3. Plasmids used in this study**

| Plasmid | Description                                                             | Source                   |
|---------|-------------------------------------------------------------------------|--------------------------|
| pGD179  | <i>yvbJ</i> ::Phyperspank- <i>optRBS-pdaC</i> (spec, amp)               | This study               |
| pGD187  | <i>ycgO</i> ::Phyperspank- <i>optRBS-pdaC</i> (erm, amp)                | This study               |
| pGD196  | <i>ycgO</i> ::Phyperspank- <i>optRBS-pdaC</i> (D285A) (erm, amp)        | This study               |
| pGD197  | <i>ycgO</i> ::Phyperspank- <i>optRBS-pdaC</i> (H427A) (erm, amp)        | This study               |
| pGD203  | <i>yvbJ</i> ::Phyperspank- <i>optRBS-pdaC</i> (D285A)-6xHis (spec, amp) | This study               |
| pGD204  | <i>yvbJ</i> ::Phyperspank- <i>optRBS-pdaC</i> (H427A)-6xHis (spec, amp) | This study               |
| pIR242  | Himar1C9 IR-spec Ppen-IR terminators (amp, erm)                         | This study               |
| pJM63   | P <sub>T7</sub> -His <sub>6</sub> -SUMO-cwIOΔcc                         | Dobihal et al., 2019 [2] |
| pYB190  | <i>ycgO</i> ::Phyperspank- <i>optRBS-iseA</i> (erm)                     | Dobihal et al., 2019 [2] |
| pWX294  | empty vector with pACYC origin and MCS (amp)                            | This study               |
| pWX634  | MmeI-TnKRM (spec, amp)                                                  | This study               |
| pWX638  | pACYC HiMar repG(ts) (amp)                                              | This study               |
| pWX642  | pACYC MmeI-TnKRM (spec, erm, amp)                                       | This study               |

**Table S4. Oligonucleotide primers used in this study**

| Oligonucleotide | Sequence                                                                 |
|-----------------|--------------------------------------------------------------------------|
| oJM36           | agaagcggccgcttattctg                                                     |
| oJM37           | ctgagcgagggagcagaactcactttttatatcctcccttttac                             |
| oJM38           | gttgaccagtgtccctgtaataaatatgacaaggccttct                                 |
| oJM39           | tcatccgtctgaagcacac                                                      |
| oJM54           | tgctatcggagagcattgg                                                      |
| oJM55           | ctgagcgagggagcagaaatcatgaaatcacctaacttttatatc                            |
| oJM56           | gttgaccagtgtccctgtaaagtgaaaaagccgttccag                                  |
| oJM57           | taatgtctctgcagtgcgag                                                     |
| oJM40           | agttgcaatcacaagtgtatg                                                    |
| oJM41           | ctgagcgagggagcagaattcatattttctccccaatgtt                                 |
| oJM42           | gttgaccagtgtccctgtaattttagagaaaacccgttcattgg                             |
| oJM53           | tcacctgtgagcatataatagtag                                                 |
| oJM3            | gattaacgaaagttgagatgttatgGAGGGAGGAAAGGCAGGA                              |
| oJM4            | caatggatgatgagttgtttgtgtCGCCGTATCTGTGCTCTC                               |
| oJM28           | TTCTGCTCCCTCGCTCAG                                                       |
| oJM29           | CAGGGAGCACTGGTCAAC                                                       |
| oGD509          | GTGAGCGGATAACAATTAAGCTTacaTAAGGAGGaactacttgTTGGCAAAAAGAATCAAATGGTTTCA    |
| oGD510          | GCTAGCatCTGCAGttaACTAGTttaTTTCGCTTCTCTTTGTTTTTAACCTC                     |
| oGD517          | CGTTGACCAAGAGCATAC                                                       |
| oGD521          | gaggcggcctgtatggccGAATTCCTTTATGATGAAATTCCTTAAAAAGGATTGAC                 |
| oGD525          | gaagAATTgGATCCatGCTAGCatCTCGAGTttaGTGATGATGATGATGATGTTTCGCTTCTCTTTGTTTTT |
| oGD540          | GCTTACTTTTCGCCGACGGCCCAATC                                               |
| oGD541          | GATTCGGGCCGTCGGCGAAAGTAAGC                                               |
| oGD542          | CCATTTTGATTGCCGATATTTACCG                                                |
| oGD543          | CGGTAAATATCGGCAATCAAAATGG                                                |
| oGD486          | cctcaaatggttcgctgGgatccttattttgacaccagaccaactggtaatggtagcg               |
| oGD487          | gtcacaagcagctgggaagGAATTCGAAATCCTTCATGTAAAGGAAC                          |

|         |                                                                        |
|---------|------------------------------------------------------------------------|
| oGD565  | GCTAGCatCTGCAGttACTAGTttaGTGATGATGATGATGATGTTTCGCTTCTCTTTGTTTTTAACTCTT |
| oGD571  | ccttttgataaagagagcgtcGAc                                               |
| oGD572  | CgacgctctctttatcaaaaggATTAGAAAAGGCTGTCCGTACG                           |
| oGD573  | GCAAGTCTTCATGATCAAAACG                                                 |
| oIR541  | gccactagttCGAAAAACGG                                                   |
| oIR542  | cggCTGCAgCAACGTTCTTG                                                   |
| oML78   | CCATTAGAACATAGGGAGAG                                                   |
| oWX1154 | GGCCGGTCGACCAGACCGGGGACTTATCATCCAACCTGTTAGCGGCCGCA                     |
| oWX1155 | AGCTTGCGGCCGCTAACAGGTTGGATGATAAGTCCCCGGTCTGGTCGACC                     |
| oWX1156 | TAGTCCACTCTCAACTCCTGATCC                                               |
| oWX1157 | GTCGACCTGCAGGCATGCAAGCTTGAGGGAAACCGTTGTGGTCTCCC                        |
| oWX1158 | AATAACTAGCATAACCCCTTGGGG                                               |
| oWX1159 | GAGGCCCAAGGGGTTATGCTAGTTATTGAATTCGTCCAGAAGGTCGATAG                     |
| oWX1160 | GTTTCCCTCAAGCTTGCATGCCTGCAGGTCGACTCTAGAGGATCCCCGGG                     |

### Supplemental References:

1. Youngman, P.J., J.B. Perkins, and R. Losick, *Genetic transposition and insertional mutagenesis in Bacillus subtilis with Streptococcus faecalis transposon Tn917*. Proc Natl Acad Sci U S A, 1983. **80**(8): p. 2305-9.
2. Dobihal, G.S., et al., *Homeostatic control of cell wall hydrolysis by the WalRK two-component signaling pathway in Bacillus subtilis*. Elife, 2019. **8**.
